# Supplementary material
Source: PubMed Central journal article supplement (PMC2787136)
Supplement: 0901989106_0901989106SI.pdf [file 0901989106_0901989106SI.pdf]

# Supporting Information

Eswaran et al. 10.1073/pnas.0901989106

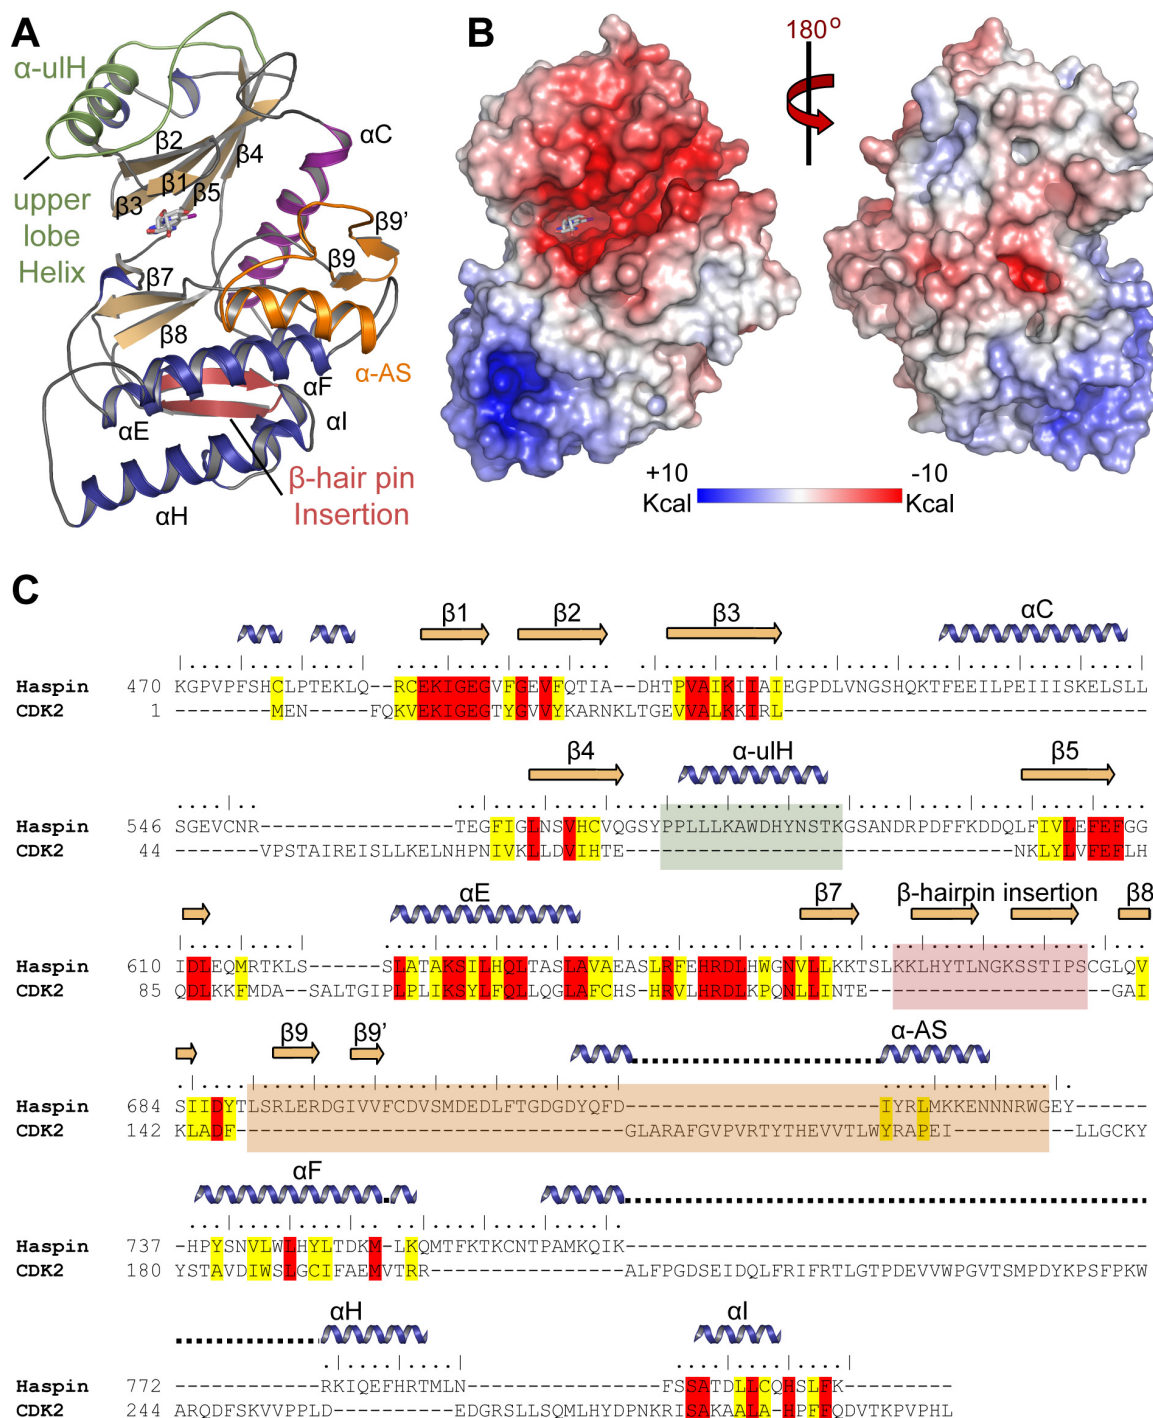

**Fig. S1.** Haspin surface electrostatics and structure-based alignment with CDK2 (PDB code 2UZ0). Main secondary structure elements are shown in panel (A). Surface electrostatics reveal a negatively charged upper lobe that might serve as a docking site for histone H3 (B). The lower lobe contains a highly positively charged region. The main secondary structure elements are highlighted in the structure-based alignment in panel (C). Conserved residues are in red.



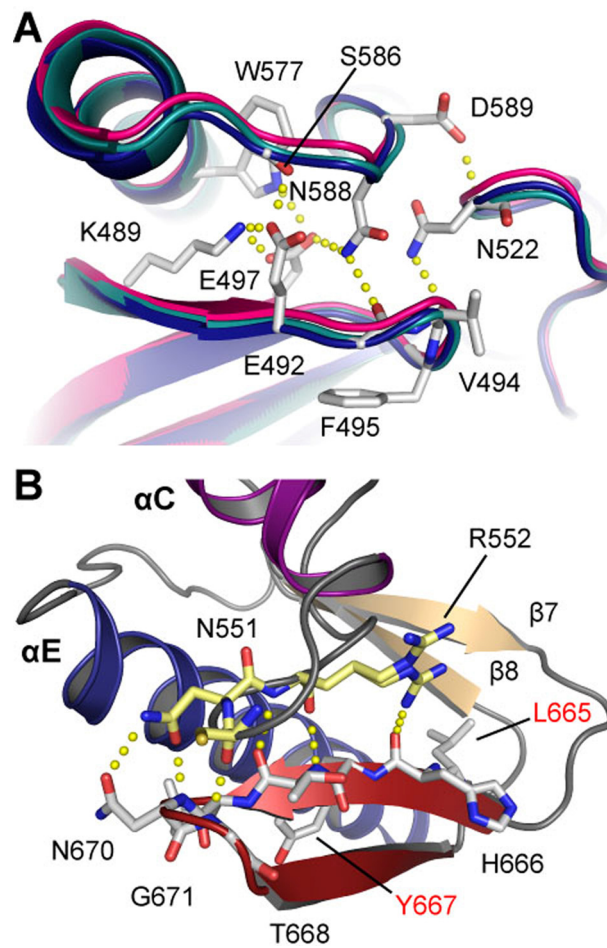

**Fig. S3.** Detailed view of the interaction of the ulH insert with the P-loop (A) and of the beta-hairpin insert with the loop C-terminal to helix  $\alpha$ C (B). Hydrogen bonds are shown as dotted lines, and residues forming interactions are shown in stick representation and are labeled.



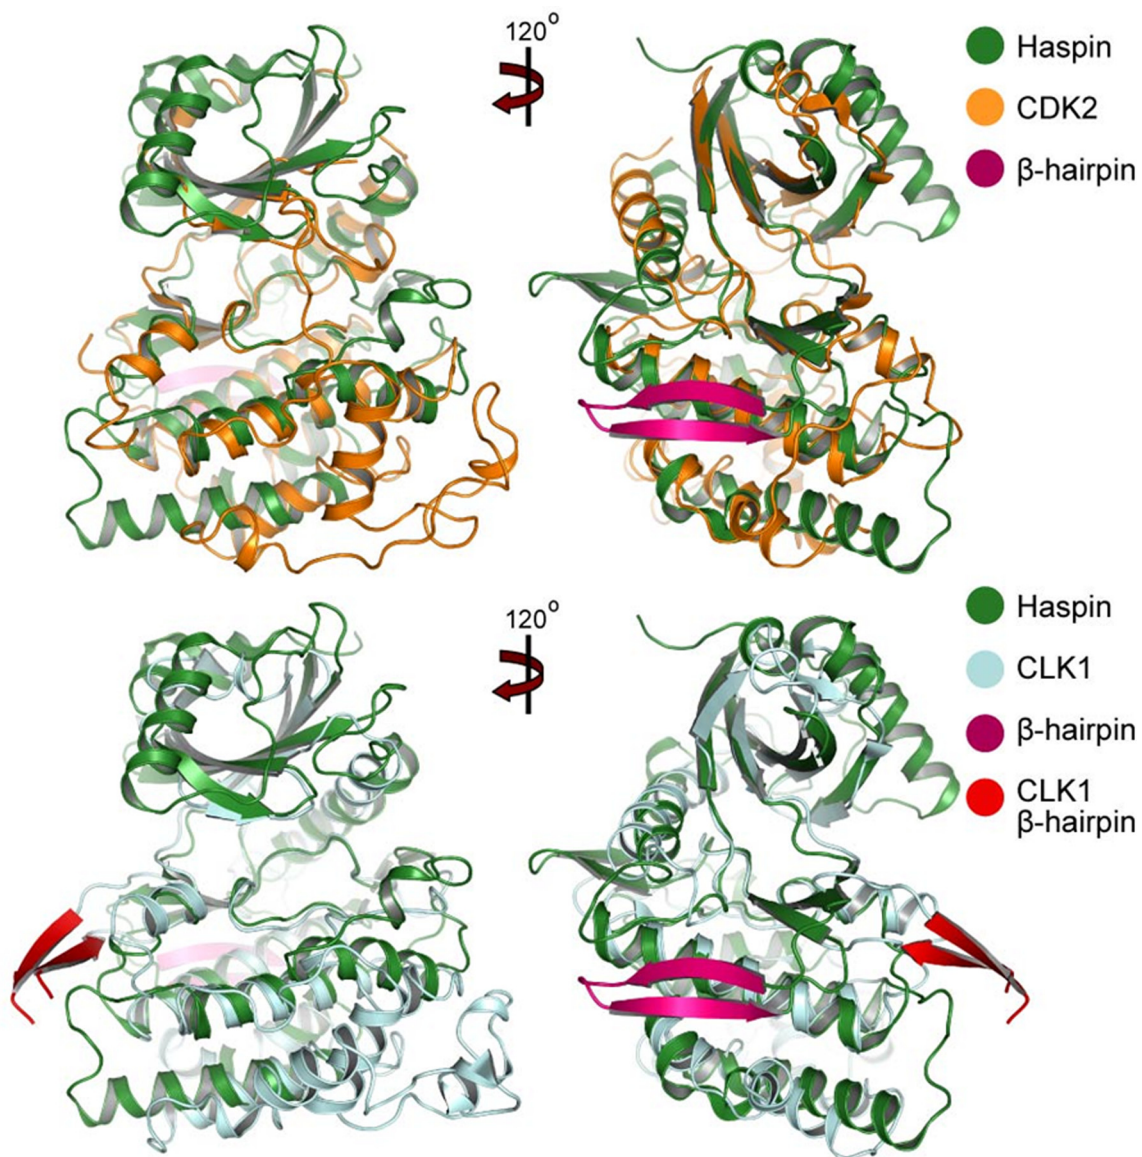

**Fig. 54.** Superimposition of haspin with CDK2 (PDB code 2UZ0) (*Upper*) and CLK1 (PDB code 1Z57) (*Lower*). The structures superimposed with haspin with an rmsd of 1.92Å for 155 residues (CDK2) and 1.84Å for 181 residues (CLK1). Shown are ribbon diagrams. The  $\beta$ -hairpin insert present in the lower lobe is highlighted. In addition, CLK family members contain a  $\beta$ -hairpin insert at that position; however, this insert is oriented in a different way and makes no contact with the upper lobe.





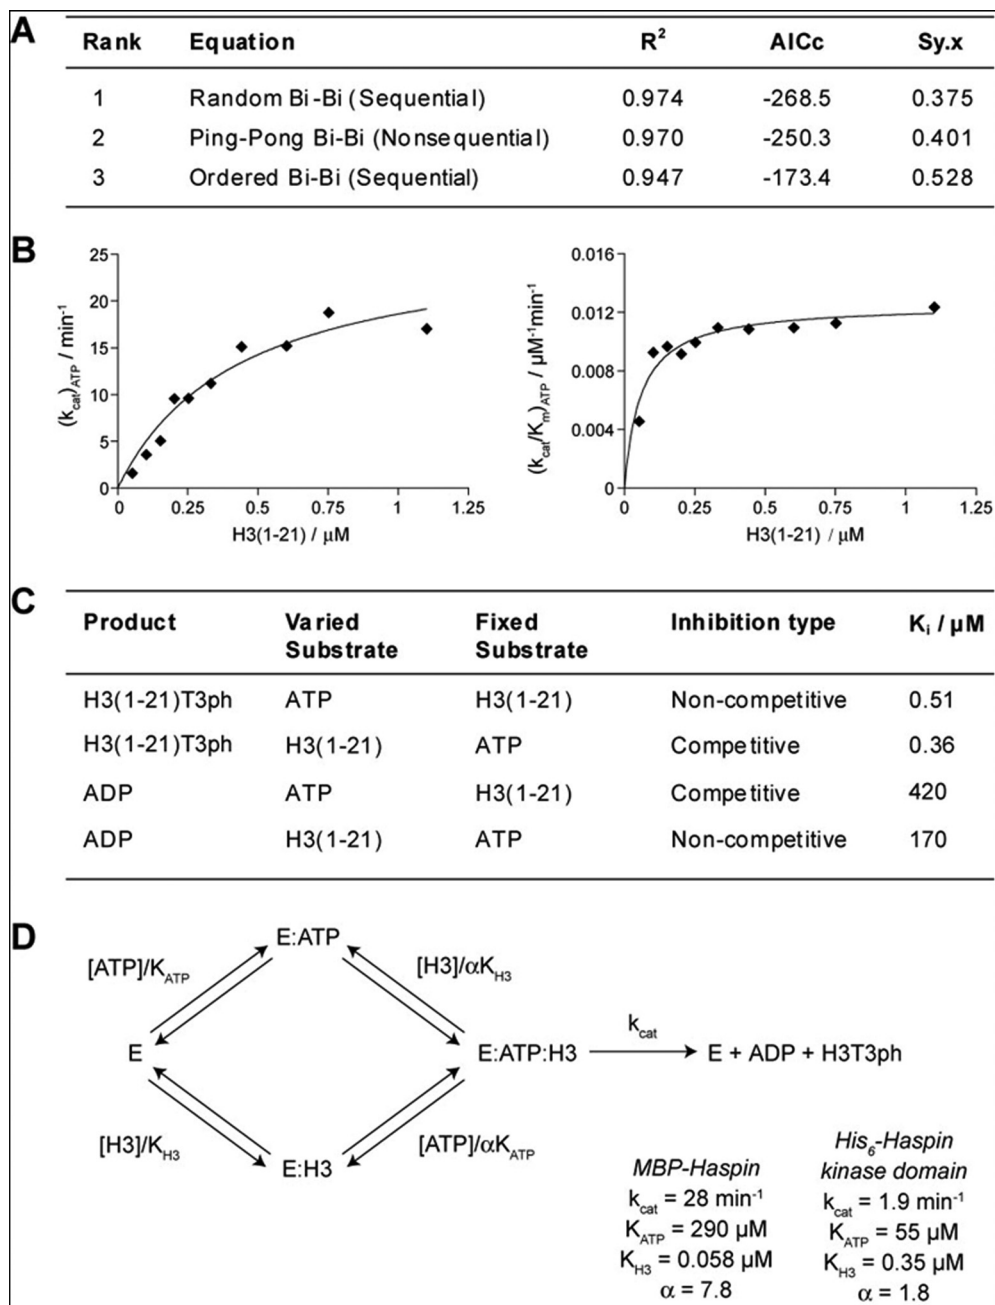

**Fig. 57.** Reaction mechanism of haspin. (A) Using nonlinear regression, the fit of the data in Fig. 4B to 3 kinetic mechanisms was ranked statistically by the coefficient of determination ( $R^2$ ), the Akaike information criterion (AICc), and the standard deviation of residuals (Sy.x). All 3 provided support for a random mechanism. (B) The data in Fig. 4B were further analyzed by the method of replots (see text). Hyperbolic curves indicate a random sequential mechanism (also see Fig. 4 C and D). (C) Product inhibition studies with MBP-haspin were performed by determining initial reaction velocities in the presence of a fixed concentration of one substrate (near  $K_m$  concentration) as a function of concentration of the second substrate, at various fixed doses of product. Results were globally fitted to equations for competitive and noncompetitive inhibition and  $K_i$  (inhibition constant) were estimated using nonlinear regression analysis. (D) Summary scheme of the haspin reaction mechanism.

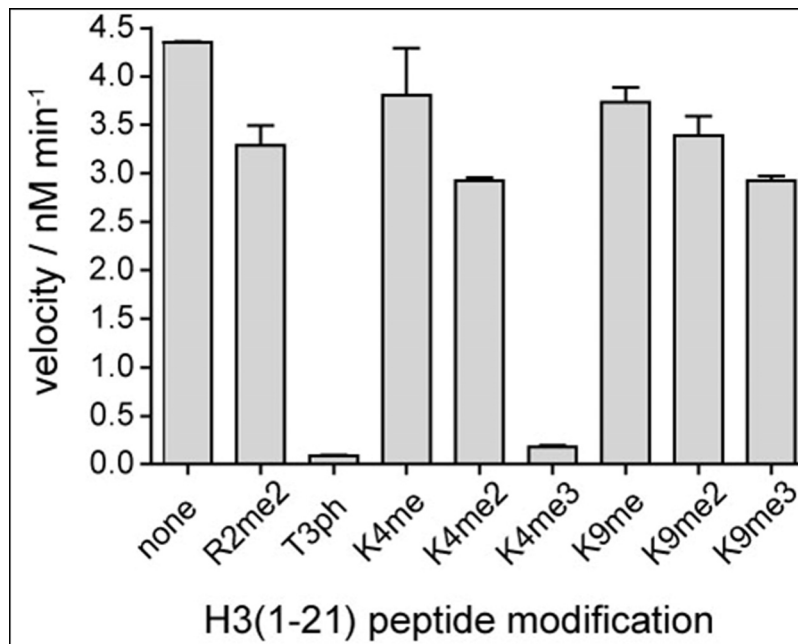

**Fig. S8.** Effect of histone H3 modifications surrounding Thr-3 on haspin activity. Kinase reactions were carried out with 6 nM His<sub>6</sub>-haspin kinase domain, 1  $\mu$ M H3 (1–21) peptide, and 120  $\mu$ M ATP for 4 min.



Table S1. Data collection and refinement statistics

|                                                 | Ligand                                        |                                               |                                               |
|-------------------------------------------------|-----------------------------------------------|-----------------------------------------------|-----------------------------------------------|
|                                                 | Iodotubercidin                                | AMP                                           | Iodotubercidin/PO <sub>4</sub> <sup>3-</sup>  |
| Data collection                                 |                                               |                                               |                                               |
| PDB code                                        | 2VUW                                          | 3DLZ                                          | 3IQ7                                          |
| Space group                                     | P2 <sub>1</sub> 2 <sub>1</sub> 2 <sub>1</sub> | P2 <sub>1</sub> 2 <sub>1</sub> 2 <sub>1</sub> | P2 <sub>1</sub> 2 <sub>1</sub> 2 <sub>1</sub> |
| Cell dimensions: a/b/c, Å                       | 78.66/78.88/79.86                             | 73.31/49.73/98.01                             | 69.03/78.49/87.05                             |
| $\alpha/\beta/\gamma$ , degrees                 | 90.0/90.0/90.0                                | 90.0/90.0/90.0                                | 90.0/90.0/90.0                                |
| Resolution, Å*                                  | 1.80 (1.80–1.90)                              | 1.85 (1.95–1.85)                              | 2.00 (2.00–2.11)                              |
| Unique observations*                            | 45,276 (5,506)                                | 30,974 (4,362)                                | 32,676 (4,697)                                |
| Completeness, %*                                | 97.1 (82.9)                                   | 99.1 (97.6)                                   | 100.0 (100.0)                                 |
| Redundancy*                                     | 3.5 (2.5)                                     | 2.9 (2.8)                                     | 3.6 (3.5)                                     |
| Rmerge*                                         | 0.074 (0.358)                                 | 0.087 (0.512)                                 | 0.085 (0.620)                                 |
| $I/\sigma I$ *                                  | 5.9 (2.2)                                     | 9.3 (2.0)                                     | 10.6 (2.0)                                    |
| Refinement                                      |                                               |                                               |                                               |
| Resolution, Å                                   | 1.80                                          | 1.85                                          | 2.00                                          |
| Rwork/Rfree, %                                  | 14.7/16.9                                     | 16.7/21.6                                     | 17.2/20.7                                     |
| Number of atoms (protein/other/water)           | 2,941/22/411                                  | 2,669/32/462                                  | 2,641/35/262                                  |
| B-factors (protein/other/water), Å <sup>2</sup> | 25.78/17.41/40.65                             | 20.22/22.79/35.28                             | 27.86/24.00/28.59                             |
| rmsd bonds, Å                                   | 0.010                                         | 0.016                                         | 0.016                                         |
| rmsd angles, degrees                            | 1.092                                         | 1.545                                         | 1.554                                         |
| Ramachadran favored, %                          | 96.37                                         | 96.63                                         | 95.95                                         |
| Allowed, %                                      | 3.12                                          | 2.76                                          | 3.74                                          |
| Disallowed, %                                   | 0.31                                          | 0.61                                          | 0.31                                          |

\*Values in parentheses correspond to the highest-resolution shell.

**Table S2. Comparison of kinetic parameters of full-length MBP-haspin and His<sub>6</sub>-haspin kinase domain**

|                          | $k_{\text{cat}}$ ( $\text{min}^{-1}$ ) | $K_{\text{H}_3}$ ( $\mu\text{M}$ ) | $K_{\text{ATP}}$ ( $\mu\text{M}$ ) | $\alpha$ |
|--------------------------|----------------------------------------|------------------------------------|------------------------------------|----------|
| MBP-haspin               | 28                                     | 0.058                              | 290                                | 7.8      |
| His <sub>6</sub> -kinase | 1.9                                    | 0.35                               | 55                                 | 1.8      |

Kinetic constants were estimated from nonlinear least squares fitting of replots (see Figs. 4 and S7), as described in ref. 19.
